# Supplementary material
Source: HighWire-hosted journal article supplement (https://bmjopen.bmj.com/content/9/4/e025388)
Supplement: inline-supplementary-material-1 [file inline-supplementary-material-1.pdf]

**Urine Testing for HPV: the UVC pilot study – Questionnaire**  
**Version One, DATE**

**Before completing this questionnaire please make sure you have read the information sheet. By completing this questionnaire you consent to take part in the study. To complete the questionnaire please circle the answer most applicable to you in each question, tick the correct box or write in the space provided.**

**Previous Knowledge of HPV**

**Before today had you previously heard of HPV (Human Papillomavirus)?**      Yes      No      Unsure

**About the tests today**

**Would you have liked more information about how to provide the urine sample?**      Yes      No

**Would you have liked more information about how to use the self-sampling device?**      Yes      No

**How much do you agree with these statements? Please circle the appropriate number for each statement.**

|                                                                                                                              | <i><b>Strongly<br/>Disagree</b></i> |   |   |   | <i><b>Strongly<br/>Agree</b></i> |
|------------------------------------------------------------------------------------------------------------------------------|-------------------------------------|---|---|---|----------------------------------|
| <i>I feel confident providing a urine sample to be tested for HPV.</i>                                                       | 1                                   | 2 | 3 | 4 | 5                                |
| <i>I would worry I had not provided the urine sample correctly.</i>                                                          | 1                                   | 2 | 3 | 4 | 5                                |
| <i>I am worried how accurate the result from the urine sample is.</i>                                                        | 1                                   | 2 | 3 | 4 | 5                                |
| <i>I feel confident I used the self-sampling device correctly.</i>                                                           | 1                                   | 2 | 3 | 4 | 5                                |
| <i>I would worry I had not used the self-sampling device properly.</i>                                                       | 1                                   | 2 | 3 | 4 | 5                                |
| <i>I am worried about how accurate the result from the self-sampling device is.</i>                                          | 1                                   | 2 | 3 | 4 | 5                                |
| <i>I would prefer a health professional to take my sample than to take a sample myself.</i>                                  | 1                                   | 2 | 3 | 4 | 5                                |
| <i>A sample taken by a health professional is more reliable.</i>                                                             | 1                                   | 2 | 3 | 4 | 5                                |
| <i>I would prefer to take my own sample.</i>                                                                                 |                                     |   |   |   |                                  |
| <i>In the future I would be happy to use only a urine sample to be tested for HPV.</i>                                       | 1                                   | 2 | 3 | 4 | 5                                |
| <i>In the future I would be happy to be tested for HPV from a sample taken by myself using the vaginal HPV self-sampler.</i> | 1                                   | 2 | 3 | 4 | 5                                |
| <i>I felt I understood the instructions that were given to me.</i>                                                           | 1                                   | 2 | 3 | 4 | 5                                |
| <i>I was happy to provide three samples.</i>                                                                                 | 1                                   | 2 | 3 | 4 | 5                                |

---

**Which test would you prefer to take?**

Urine test                      Using self –sampler      Clinician taken sample

**What would be your second choice?**

Urine test                      Using self –sampler      Clinician taken sample

**Which of these words describes how you felt about providing a urine sample? (Please circle all that apply)**

Uncomfortable      It was easy                      Embarrassed                      Private                      Reliable                      Convenient

**Which of these words describes how you felt about using the self-sampling test? (Please circle all that apply)**

Uncomfortable      It was easy                      Embarrassed                      Private                      Reliable                      Convenient

**Which of these words describes how you felt about having a health professional take a sample? (Please circle all that apply)**

Uncomfortable      It was easy                      Embarrassed                      Private                      Reliable                      Convenient

---

**About you**

**What age group do you belong to? (shown in years)**

24 and under    25-29      30-34      35-39      40-44      45-49      50-54      55-59      60-64      65-69      70+

**Which of the following best describes your ethnicity? Please circle your answer below**

|                                                       |                            |                            |                            |
|-------------------------------------------------------|----------------------------|----------------------------|----------------------------|
| White British                                         | Indian                     | Caribbean                  | White and Black Caribbean  |
| White Irish                                           | Pakistani                  | African                    | White and Black African    |
| Any other White background                            | Bangladeshi                | Any other Black background | White and Asian            |
| Chinese                                               | Any other Asian background |                            | Any other mixed background |
| Any Other Ethnic Group (please provide details) ..... |                            |                            | Prefer not to say          |

**How would you best describe your employment status?**

Employed                      Unemployed                      Student                      Full time parent                      Retired

**Which of these qualifications do you have? Please circle all that apply**

GCE O-level/GCSE                      A-level or equivalent                      Undergraduate                      Postgraduate

Other (please specify) .....

---

**Thank you for taking the time to complete this questionnaire. Please place it in the white envelope given to you and put it in the box marked 'Questionnaires' or hand it in the envelope to the clinic receptionist.**
