# Supplementary material
Source: HighWire-hosted journal article supplement (https://bmjopen.bmj.com/content/9/4/e025388)

SUPPLEMENTAL FIGURE 1: Detection of internal beta globin control in preservative-fixed urine using Abbott RealTime assay within 48 hours and after one month showed no reduction in DNA stability over time

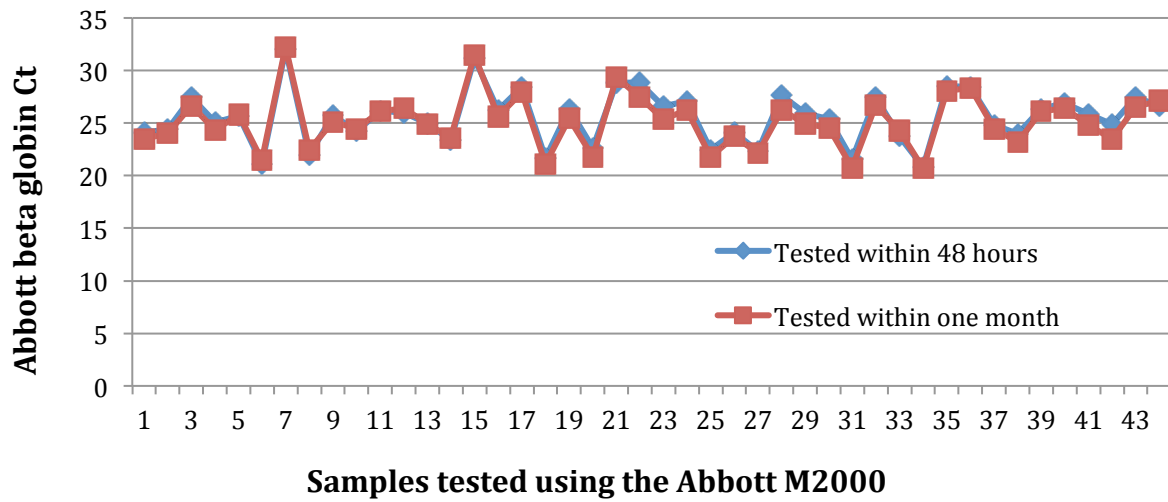

Supplement: inline-supplementary-material-2 [file inline-supplementary-material-2.pdf]
